# Supplementary material
Source: ML conference proceedings conference paper supplement (https://openaccess.thecvf.com/content/CVPR2026/html/An_Learning_Compact_3D_CVPR_2026_paper.html)
Supplement: Supplementary file 1 [file An_Learning_Compact_3D_CVPR_2026_supplemental.pdf]

001 **Appendix**

002 This appendix provides additional details on implementa-  
003 tion, evaluation metrics, and qualitative results that could  
004 not be included in the main document due to space con-  
005 straints. The document is organized as follows:

- 006 • **Section A** presents extended experiments in which  
007 Comp3D- $\mathcal{G}$  is trained on multiple diverse datasets to im-  
008 prove its scalability and generalizability.
- 009 • **Section B** provides additional implementation details re-  
010 garding the architecture of the Gaussian Decoder and the  
011 training details for Any-Feature 3D Lifting.
- 012 • **Section C** details the experimental settings, including  
013 dataset descriptions, baseline configurations, and evalua-  
014 tion protocols for efficient novel view synthesis, 3D scene  
015 understanding, and multi-view feature encoding.
- 016 • **Section D** presents additional ablation studies comparing  
017 compact reconstruction strategies and analyzing compo-  
018 nents of Comp3D- $\mathcal{F}$ , followed by discussions on the au-  
019 toencoder design, FPS analysis, and limitations.
- 020 • **Section E** provides additional quantitative experimental  
021 results, including latent decoding or two-view novel view  
022 synthesis.
- 023 • **Section F** presents additional qualitative results, includ-  
024 ing visualizations of attention maps, 3D scene under-  
025 standing, feature PCA, and renderings from 24-view in-  
026 puts.

027 **A. Multi Dataset Training**

028 We extend Comp3D- $\mathcal{G}$  to improve its scalability and gen-  
029 eralizability by incorporating diverse training datasets, in-  
030 creasing the number of input views, and scaling up the  
031 number of Gaussians. However, since each dataset ex-  
032 hibits different camera parameters and scene scales, naively  
033 combining them makes training C3G unstable and difficult  
034 to converge. To address this, we first describe the archi-  
035 tectural modifications made to accommodate these varia-  
036 tions (§ A.1), followed by implementation details covering  
037 dataset configurations and training procedures (§ A.2). Fi-  
038 nally, we present experimental results demonstrating the ef-  
039 fectiveness of this extension (§ A.3).

040 **A.1. Methodology**

041 **Architecture modification.** To support training on diverse  
042 datasets with varying numbers of input views and an in-  
043 creased number of Gaussians, we introduce minimal mod-  
044 ifications to the original Comp3D- $\mathcal{G}$  architecture. To fully  
045 exploit the pretrained weights of Comp3D- $\mathcal{G}$ , which were  
046 already well-trained on the RealEstate10K dataset [52], we  
047 keep the architectural changes as minimal as possible to pre-  
048 serve the original structure.

049 First, to handle differences in the intrinsics of the cam-  
050 era and the scale of the scene between training datasets, we

incorporate the intrinsic embeddings as follows [19, 48].  
Specifically, we additionally take camera intrinsics as in-  
put and pass them through a projection layer consisting of  
a 2-layer MLP initialized with zero weights. The projected  
intrinsic features are then added to the patch-embedded fea-  
tures within VGGT [42].

Next, we increase the number of Gaussians to better  
cover larger scenes and capture finer details. To achieve  
this, we replicate the weights of the Gaussian head. In  
the original architecture, the Gaussian head generates one  
Gaussian per token. By replicating its weights  $N_G$  times,  
we instead produce  $N_G$  Gaussians per token, resulting in a  
total of  $N \times N_G$  Gaussians. Since the replicated heads share  
the same initialization, Gaussians originating from the same  
token are localized in the same spatial region, encouraging  
them to focus on capturing finer local details.

**Additional loss.** To improve training stability, we intro-  
duce additional geometry supervision in the form of depth  
and normal losses, encouraging the network to develop a  
stronger understanding of scene geometry. We first extract  
pseudo ground-truth normal maps  $N_t$  and depth maps  $D_t$   
from the point maps produced by VGGT [42] for the corre-  
sponding view  $I_t$ . We then render the depth maps  $\hat{D}_t$  and  
normal maps  $\hat{N}_t$  using the same rasterizer as 3DGS [20],  
replacing the color attributes with  $z$ -value and surface nor-  
mals. For supervision, we apply scale-shift invariant loss  
term for depth and MSE loss for normals,

$$\mathcal{L}_{\text{depth}} = \|(\alpha \cdot D_t + \beta) - \hat{D}_t\|, \quad (1)$$

$$\mathcal{L}_{\text{normal}} = \|N_t - \hat{N}_t\|, \quad (2)$$

where  $\alpha$  and  $\beta$  is the scale and shift parameters obtained via  
least-squares alignment between rendered depth and pseudo  
ground-truth depth, following [43].

The overall loss term is followed as:

$$\mathcal{L} = \mathcal{L}_{\text{novel}} + \lambda_{\text{depth}} \mathcal{L}_{\text{depth}} + \lambda_{\text{normal}} \mathcal{L}_{\text{normal}}, \quad (3)$$

where  $\lambda_{\text{depth}}$  and  $\lambda_{\text{normal}}$  denotes the loss weight of normal  
and depth.

058 **A.2. Implementation details**

059 For efficient training, we initialize from the pretrained  
060 weights of Comp3D- $\mathcal{G}$  which were trained solely on the  
061 RealEstate10K dataset [52]. We set the number of Gaus-  
062 sians per query token to  $N_G = 16$ . During training, we ran-  
063 domly sample 2 to 24 images per scene, with a maximum of  
064 192 images per epoch, and train at a resolution of  $224 \times 224$ .  
065 We use the AdamW optimizer [21] with a learning rate of  
066  $1e-6$ . The geometry loss weights are set to  $\lambda_{\text{depth}} = 0.01$   
067 and  $\lambda_{\text{normal}} = 0.001$ . We train for 150K steps in total, with  
068 all other hyperparameters following Comp3D- $\mathcal{G}$ .

069 For training, we incorporate 8 datasets spanning di-  
070 verse domains. Specifically, we use RealEstate10K [52],

Table 10. **Comparison of novel view synthesis with multi-view input images on DL3DV [27].** Our method generates fewer Gaussians while achieving competitive or superior quality.

| Methods             | 12 view |       |        |      | 24 view |       |        |        | 36 view |       |        |        |
|---------------------|---------|-------|--------|------|---------|-------|--------|--------|---------|-------|--------|--------|
|                     | PSNR↑   | SSIM↑ | LPIPS↓ | #G↓  | PSNR↑   | SSIM↑ | LPIPS↓ | #G↓    | PSNR↑   | SSIM↑ | LPIPS↓ | #G↓    |
| AnySplat [19]       | 17.004  | 0.439 | 0.431  | 570K | 17.263  | 0.445 | 0.439  | 1,140K | 18.286  | 0.525 | 0.286  | 1,576K |
| VGGT+NoPo [42, 48]  | 11.714  | 0.320 | 0.550  | 602K | 10.285  | 0.262 | 0.607  | 1,204K | 9.65    | 0.236 | 0.628  | 1,806K |
| <b>C3G (Ours)</b>   | 18.768  | 0.505 | 0.408  | 2K   | 18.843  | 0.511 | 0.404  | 2K     | 18.675  | 0.504 | 0.412  | 2K     |
| <b>C3G++ (Ours)</b> | 19.368  | 0.512 | 0.431  | 32K  | 19.570  | 0.521 | 0.425  | 32K    | 19.736  | 0.523 | 0.424  | 32K    |

101 DL3DV [27], HyperSim [36], WildRGBD [46], Tar-  
 102 tanAir [44], ARKitScenes [3], BlendedMVS [47], and  
 103 MapFree [1]. These datasets collectively cover a wide range  
 104 of scenarios, including indoor, outdoor, and object-centric  
 105 scenes across both real and synthetic domains.

### 106 A.3. Experiments

107 We evaluate novel-view synthesis performance on the test  
 108 split of the DL3DV dataset [27]. As shown in Tab. 10, our  
 109 model outperforms the baselines, benefiting from its im-  
 110 proved generalizability and the increased number of Gaus-  
 111 sians, which together enable better coverage of large scenes  
 112 and finer detail capture. This is particularly evident on  
 113 DL3DV, which predominantly consists of outdoor scenes  
 114 with large spatial extents that are difficult to represent with  
 115 only 2K Gaussians. By scaling up the number of Gaussians,  
 116 our model can cover a significantly larger portion of each  
 117 scene, leading to improved reconstruction quality. Further-  
 118 more, the results demonstrate that our model is robust to  
 119 varying numbers of input views.

## 120 B. Additional implementation details

### 121 B.1. Details of Gaussian decoder

122 **Architecture details.** We first extract feature maps  
 123  $\mathbf{F}_v = \mathcal{E}(I_v)$  from the visual encoder  $\mathcal{E}(\cdot)$  given  $V$   
 124 input images  $\{I_v\}_{v=1}^V$ . For VGGT [42] which supports  
 125 multi-view inputs, we directly obtain  $V$  feature maps  
 126  $\{\mathbf{F}_v\}_{v=1}^V = \mathcal{E}(\{I_v\}_{v=1}^V)$  in a single feed-forward pass. For  
 127 DINOv3 [39], we obtain  $V$  feature maps by passing each  
 128 image to the encoder independently. We then concatenate  
 129 the feature maps with the learnable tokens  $\mathbf{Q}$ , which are  
 130 randomly initialized. This concatenated representation is  
 131 processed through  $L$  transformer layers  $\mathcal{T}_G(\cdot)$ , which con-  
 132 sists of self-attention layers and MLP layers with ReLU ac-  
 133 tivation functions and layer normalization [2]:

$$134 \quad [\bar{\mathbf{Q}}; \bar{\mathbf{F}}] = \mathcal{T}_G([\mathbf{Q}; \mathbf{F}]), \quad (4)$$

135 where  $[\cdot, \cdot]$  denotes concatenation of dimension axis,  $\bar{\mathbf{Q}}$   
 136 denotes refined learnable tokens and  $\bar{\mathbf{F}}$  denotes refined fea-  
 137 tures. In the self-attention layer, learnable tokens and the  
 138 feature tokens are each projected to query, key, and value  
 139 features to process the attention calculation. The query, key

and value features of learnable tokens  $\mathbf{Q}$  and visual encoder  
 features  $\mathbf{F}$  is calculated as follows:

$$142 \quad Q = [Q_G; Q_I] = \mathcal{P}_Q([\mathbf{Q}; \mathbf{F}]), \quad (5)$$

$$143 \quad K = [K_G; K_I] = \mathcal{P}_K([\mathbf{Q}; \mathbf{F}]), \quad (6)$$

$$144 \quad V = [V_G; V_I] = \mathcal{P}_V([\mathbf{Q}; \mathbf{F}]), \quad (7)$$

145 where  $Q_G, Q_I$  denotes query features,  $K_G, K_I$  denotes key  
 146 features, and  $V_G, V_I$  denotes value features of learnable to-  
 147 ken and visual encoder features, respectively. And  $\mathcal{P}_Q, \mathcal{P}_K$ ,  
 148 and  $\mathcal{P}_V$  denote the projection layer of query, key, and value,  
 149 respectively.

150 Then, the resulting output of self-attention layer in  $\mathcal{T}_G$   
 151 is computed as:

$$152 \quad \text{Attn}(Q, K, V) = \text{Softmax}\left(\frac{QK^\top}{\sqrt{d_Q}}\right)V, \quad (8)$$

153 where  $d_Q$  denotes the channel dimension of query features.

154 Each of the refined learnable tokens  $\bar{\mathbf{Q}}_i$  are decoded as  
 155 a single Gaussian  $\mathbf{G}_i$  by passing the Gaussian head  $H_G(\cdot)$ ,  
 156 which consists of a single linear layer:

$$157 \quad \mathbf{G}_i = H_G(\bar{\mathbf{Q}}_i). \quad (9)$$

158 **Attention visualization.** To visualize the attention map in  
 159 Fig. 3-(b), we select one Gaussian  $\mathbf{G}_i$  and its correspond-  
 160 ing learnable tokens  $\bar{\mathbf{Q}}_i$ . We then calculate the attention  
 161 weights between the query features of the learnable token  
 162  $Q_{G_i}$  and the key features  $K_I$  as follows:

$$163 \quad A_i = Q_{G_i} \cdot K_I^\top, A_i \in \mathbb{R}^{N_{\text{head}} \times h \times w}, \quad (10)$$

164 where  $N_{\text{head}}$  denotes number of heads. We average the  $A_i$   
 165 at the head dimension, then apply min-max normalization  
 166 for better visualization.

### 167 B.2. Details of feature decoder

168 **Architecture details.** We initialize Comp3D- $\mathcal{F}$  by copying  
 169 the Comp3D- $\mathcal{G}$ 's architecture and parameters, except for the  
 170 learnable tokens and the Gaussian head. We first extract  
 171 feature maps  $\mathbf{F}'_v = \mathcal{E}'(I_v)$  using the user-desired visual en-  
 172 coder  $\mathcal{E}'(\cdot)$ . We then introduce new learnable feature tokens  
 173  $\mathbf{Q}'$  and concatenate them with  $\mathbf{F}'_v$ , which are then processed  
 174 through  $\mathcal{T}_{\mathcal{F}}(\cdot)$  with the same architecture as  $\mathcal{T}_G(\cdot)$ :

$$175 \quad [\bar{\mathbf{Q}}'; \bar{\mathbf{F}}'] = \mathcal{T}_{\mathcal{F}}([\mathbf{Q}'; \mathbf{F}']), \quad (11)$$

176 where  $\bar{\mathbf{Q}}'$  denotes the refined learnable tokens and  $\bar{\mathbf{F}}'$  denotes the refined features. In the self-attention layers of  $\mathcal{T}_{\mathcal{F}}$ ,  
177 we reuse query  $Q$  and key  $K$  features from  $\mathcal{T}_{\mathcal{G}}$  with stop-  
178 gradients, while only the value projection layer is newly  
179 trained:  
180

$$181 \quad V' = [V'_G; V'_I] = \mathcal{P}'_V([\mathbf{Q}'; \mathbf{F}']), \quad (12)$$

182 where  $V'_G, V'_I$  denote the value features of the learnable fea-  
183 ture tokens and features from  $\mathcal{E}'$ , respectively, and  $\mathcal{P}'_V$  de-  
184 notes the projection layer of value in  $\mathcal{T}_{\mathcal{F}}$ .

185 Then, the resulting output of self-attention layer in  $\mathcal{T}_{\mathcal{F}}$  is  
186 computed as:

$$187 \quad \text{Attn}(Q, K, V') = \text{Softmax}\left(\frac{QK^\top}{\sqrt{d_Q}}\right)V'. \quad (13)$$

188 These refined learnable feature tokens  $\bar{\mathbf{Q}}'$  are converted  
189 to multi-view aggregated features  $\mathbf{F}''_i$  for each Gaussian  $\mathbf{G}_i$   
190 by passing the feature head  $H_{\mathcal{F}}$ , which consists of a single  
191 linear layer:

$$192 \quad \mathbf{F}''_i = H_{\mathcal{F}}(\bar{\mathbf{Q}}'_i). \quad (14)$$

193 Note that the introduction of new learnable queries  $\mathbf{Q}'$   
194 is to enable Comp3D- $\mathcal{F}$  to take features extracted from  
195 any user-desired visual encoder  $\mathcal{E}'(\cdot)$  as input, considering  
196 that different features ( $\mathcal{E}(\cdot), \mathcal{E}'(\cdot)$ ) will have different fea-  
197 ture dimensions. When the two visual encoders are identi-  
198 cal ( $\mathcal{E}(\cdot) = \mathcal{E}'(\cdot)$ ), we can additionally copy the learned  
199 queries  $\mathbf{Q}$  from Comp3D- $\mathcal{G}$ , only training the value projec-  
200 tion layer  $\mathcal{P}'_V(\cdot)$  and the feature head  $H_{\mathcal{F}}(\cdot)$ .

## 201 C. Experimental settings

### 202 C.1. Novel view synthesis

203 **Datasets.** To evaluate novel view synthesis, we use the  
204 RealEstate10K [52] dataset. We adopt the same train-test  
205 split as prior work [5, 6, 48]. RealEstate10K primarily con-  
206 tains indoor real estate videos with camera poses computed  
207 using COLMAP [38]. For multi-view evaluation, we ran-  
208 domly sample 1,000 image sets from the test split, each con-  
209 sisting of multiple context views and 3 target views that are  
210 disjoint from the context views.

211 **Baselines.** For 2-view input settings, we compare against  
212 SOTA generalizable feed-forward methods on novel view  
213 synthesis. We compare PixelSplat [5] and MVSplat [6]  
214 as *Pose-dependent* categories, which require ground-truth  
215 pose information for input. We also compare our model  
216 with *Pose-free* categories which use only rgb images as in-  
217 puts such as CoPoNeRF [17], Splatt3R [40], PF3plat [16],  
218 SPFSplat [18], NoPoSplat [48]. We also reimplement the  
219 VGGT+NoPo, which replaces NoPoSplat’s MAST3R [24]  
220 backbone with VGGT [42] while maintaining NoPoSplat’s  
221 pipeline to estimate per-pixel Gaussians. Ours also fall into  
222 *Pose-free* settings.

For the multi-view ( $V > 2$ ) settings, we compare against  
state-of-the-art generalizable methods that support arbitrary  
numbers of input views, such as AnySplat [19]. We evaluate  
using various numbers of input views: 12, 24, and 36. We  
also evaluate VGGT+NoPo under the same settings. For  
AnySplat, we provide input images at  $448 \times 448$  resolutions,  
which perform better than  $256 \times 256$ , and render target view  
images at  $256 \times 256$  resolution.

**Evaluation protocol.** Given unposed images as inputs,  
our method reconstructs and represents 3D scenes using  
3D Gaussians. We rasterize the 3D Gaussians at ground-  
truth camera poses and compare the rendered images with  
ground-truth target views. We report standard novel view  
synthesis metrics such as PSNR, SSIM, and LPIPS.

However, as discussed in NoPoSplat [48], reconstructing  
3D scenes from sparse unposed views is inherently scale-  
ambiguous. Although our method successfully generates  
3D Gaussians, they may not fully align with the ground-  
truth scene scale in the validation dataset. To ensure fair  
comparison with other baselines, we follow pose-free meth-  
ods by optimizing the target view camera pose while freez-  
ing all other parameters. Specifically, we first reconstruct  
3D Gaussians, then freeze them and optimize only the target  
camera pose such that the rendered image closely matches  
the ground-truth target view. Finally, we compute metrics  
using the optimized target view camera poses. Note that this  
optimization scheme is only needed for evaluation purposes  
and is not required in real-world scenarios.

For the multi-view settings, we additionally perform  
short test-time optimization following 3DGS [20], denoted  
as C3G w/ TTO, NoPo+VGGT w/ TTO and AnySplat w/  
TTO. We use the predicted Gaussians as initialization and  
conduct per-scene optimization for a limited number of  
steps. Specifically, we set the optimization steps to 1,000  
steps with densification intervals of 100 steps. We set the  
learning rate as follows: means at  $1.6e-4$ , scales at  $3e-4$ , ro-  
tations at  $1e-3$ , harmonics at  $2.5e-3$ , and densities at  $5e-3$ ,  
using Adam optimizer [21]. Our loss function is formulated  
as  $\mathcal{L} = 0.8\mathcal{L}_{\text{MSE}} + 0.2\mathcal{L}_{\text{SSIM}}$ , where  $\mathcal{L}_{\text{MSE}}$  denotes the MSE  
loss and  $\mathcal{L}_{\text{SSIM}}$  denotes the SSIM loss between the rendered  
image and ground-truth images. Other settings follow the  
original 3DGS. For AnySplat, we follow their default test-  
time optimization and do not conduct densification to avoid  
the Out-Of-Memory due to the number of Gaussians.

### 267 C.2. 3D scene understanding

**Datasets.** To evaluate 3D scene understanding capabilities,  
we follow previous approaches [4, 11] and use the Scan-  
Net [9] and Replica [41] datasets.

For ScanNet, we use 40 scenes following LSM [11], se-  
lected based on valid pose and depth data where Feature-  
3DGS [51] performs well. We evaluate 8 categories: wall,  
floor, ceiling, chair, table, sofa, bed, and others. We select

275 30 images with a stride of 10, and target views are chosen  
276 as the 1st and 4th images within every 8-image interval.

277 For Replica, we select 80 images with a stride of 3, and  
278 the target view is the 2nd image within every 8-image in-  
279 terval. We use camera poses obtained from COLMAP [38].  
280 We evaluate 3 scenes where LSeg [25] performs well: of-  
281 fice3, office4, and room1. We select 5-6 categories per  
282 scene. Specifically, for office3, we use wall, ceiling, floor,  
283 chair, and table; for office4, we use wall, ceiling, floor,  
284 chair, tv-screen, and table; for room1, we use wall, ceiling,  
285 floor, bed, and blinds.

286 **Baselines.** To validate our effectiveness, we compare our  
287 model with per-scene optimized feature novel-view synthe-  
288 sis tasks and feed-forward feature novel-view synthesis.

289 For per-scene optimization methods (Feature-3DGS [51]  
290 and CF<sup>3</sup> [23]), we optimize the per-scene 3D Gaussians  
291 using all the posed inputs except for target view images.  
292 We then render the 3D Gaussians to target view images to  
293 calculate the metrics. For the ScanNet dataset, there are  
294 no readily available sparse initial point clouds, so we train  
295 with randomly initialized point clouds following the previ-  
296 ous works [26, 34]. For feature-3DGS [51], we optimize  
297 for 5,000 steps to avoid overfitting. For CF<sup>3</sup> [23], we first  
298 optimize 3DGS with 30,000 steps and additionally optimize  
299 the CF<sup>3</sup> with 3,000 steps.

300 For feature novel-view synthesis (LSM [11] and Ours),  
301 we first select two input views to generate 3D Gaussians,  
302 which are then projected to target views disjoint from the  
303 input views. Following the same protocol as novel view  
304 synthesis evaluation, these methods require target pose op-  
305 timization to resolve scale ambiguity.

306 For LSeg [25] and MaskCLIP [50], we directly extract  
307 features from the target viewpoint images, since these meth-  
308 ods cannot render features at novel viewpoints like 3D-  
309 based approaches.

310 **Evaluation protocol.** Given RGB images as input, we  
311 first extract language-aware features using models such as  
312 LSeg [25] or MaskCLIP [50]. 3D Gaussians with lifted  
313 features are generated following each method’s procedure,  
314 then projected to the target and source views. The target  
315 view denotes an unseen viewpoint not present in the in-  
316 put, while the source view denotes a seen viewpoint that  
317 every method has observed at least once. We render both  
318 RGB images and features at each viewpoint. The rendered  
319 features are then processed into segmentation maps by se-  
320 lecting the most relevant CLIP [35] text embeddings corre-  
321 sponding to each label. We report open-vocab segmentation  
322 metrics (mIOU and Accuracy), and novel view synthesis  
323 metrics (PSNR, SSIM, and LPIPS).

### 324 C.3. Multi-view feature encoding

325 Obtaining multi-view invariant features, also termed as 3D  
326 aware features, has been a long-standing goal in computer

vision and graphics. Probe3D [10] defines a set of tasks, in-  
327 cluding two-view correspondences [7, 8, 12–15] and single-  
328 view depth estimation [33], to probe the 3D awareness of  
329 the features. FiT3D proposes a two-stage fine-tuning task  
330 to build view-invariant features, where they first train more  
331 than 1000 per-scene feature-3DGS with the desired fea-  
332 tures. With the pre-trained 3DGS over multiple scenes, they  
333 finetune the original vision encoder to follow the rendered  
334 features from the 3D Gaussians. They show that after train-  
335 ing, they achieve higher correspondence scores in the task  
336 defined in Probe3D. As our Comp3D- $\mathcal{F}$  can aggregate the  
337 input features, we analyze the effectiveness of Comp3D- $\mathcal{F}$   
338 as a view-invariant feature decoder. 339

340 **Datasets.** To validate the effectiveness of our Comp3D-  
341  $\mathcal{F}$  as a multi-view invariant feature decoder, we use the  
342 ScanNet [9] dataset following Probe3D [10]. ScanNet is  
343 a large-scale dataset of indoor scenes with RGB images,  
344 depth maps, and camera poses. We evaluate on 1,500 image  
345 pairs from the test split following SuperGlue [37].

346 **Baselines.** We compare DINOv2 [31], DINOv3 [39], and  
347 VGGT tracking features [42], which are known to perform  
348 well on zero-shot correspondence estimation.

349 **Evaluation protocols.** Given two images, we first extract  
350 a feature map for each image. For ours, we first predict  
351 3D Gaussians with features and project the 3D Gaussians to  
352 each input-view pose. Then, we estimate correspondences  
353 between the two images using nearest neighbors. Following  
354 Probe3D [10], we filter the correspondence using Lowe’s  
355 ratio test [30] to find the strong unique matches to reduce the  
356 noisy correspondence. We rank the correspondences using  
357 the ratio test and keep the top 1,000 correspondences.

358 We evaluate correspondence quality using PCK @ 10px,  
359 which measures the accuracy of correspondence within 10  
360 pixels between estimated and ground-truth matches. We di-  
361 vide the image pairs into 4 groups based on viewing angle  
362 differences:  $0\sim 15^\circ$  ( $\theta_0^{15}$ ),  $15\sim 30^\circ$  ( $\theta_{15}^{30}$ ),  $30\sim 60^\circ$  ( $\theta_{30}^{60}$ ), and  
363  $60\sim 180^\circ$  ( $\theta_{60}^{180}$ ). The results can be seen in Tab. 4.

### 364 C.4. Multi-view feature upsampling

365 Feature upsampling is the task of upsampling the extracted  
366 features from pre-trained vision encoders to a higher resolu-  
367 tion for more fine-grained downstream tasks. Although our  
368 Comp3D- $\mathcal{F}$  also takes the low-resolution extracted features  
369 from  $\mathcal{E}'(\cdot)$  as input, when combined with the 3D Gaussians  
370 and rendered to a specific viewpoint, since Gaussians can  
371 be rendered at any camera pose, our model can generate  
372 features at arbitrary resolutions by setting the desired reso-  
373 lution and intrinsics in the CUDA rasterizer. In this section,  
374 we analyze whether the rendered features from Comp3D- $\mathcal{F}$   
375 can be used as an effective multi-view feature upsampler.

376 **Datasets.** We use the ScanNet [9] dataset, following the  
377 same setup as multi-view feature encoding, to evaluate the  
378 probing capability of the upsampled features.

379 **Baselines.** We compare DINOv2 [31] and DINOv3 [39]  
380 features as baselines against their upsampled versions,  
381 which match the input image resolution using AnyUp [45],  
382 a generalizable feature upsampling module.

383 **Evaluation protocols.** Following the same protocol  
384 as multi-view feature encoding, we first extract high-  
385 resolution feature maps, then estimate correspondences be-  
386 tween two images using nearest neighbors. We evaluate  
387 correspondence quality using PCK@10px with image pairs  
388 divided by viewing angle differences. We also present qual-  
389 itative results using PCA visualization to demonstrate how  
390 upsampled features capture finer details. The results can be  
391 seen in Tab. 4.

Table 11. Comparison of novel view synthesis with compact Gaussians generation strategies.

|                     | Methods          | Average         |                 |                    |                 |
|---------------------|------------------|-----------------|-----------------|--------------------|-----------------|
|                     |                  | PSNR $\uparrow$ | SSIM $\uparrow$ | LPIPS $\downarrow$ | #G $\downarrow$ |
| 2-view image input  | Sampling         | 21.340          | 0.665           | 0.272              | 2K              |
|                     | Voxelize         | 19.957          | 0.609           | 0.403              | 4K              |
|                     | Ours             | <b>22.387</b>   | <b>0.713</b>    | <b>0.259</b>       | <b>2K</b>       |
| 24-view image input | Sampling         | 22.446          | 0.714           | 0.219              | 25K             |
|                     | Sampling w/ TTO  | 25.487          | 0.832           | 0.158              | 28K             |
|                     | Voxelize         | 19.052          | 0.558           | 0.446              | 81K             |
|                     | Voxelize w/ TTO  | 27.751          | 0.885           | 0.165              | 90K             |
|                     | NoPo+VGGT        | 21.244          | 0.664           | 0.200              | 1,204K          |
|                     | NoPo+VGGT w/ TTO | 28.463          | 0.902           | 0.135              | 1,204K          |
|                     | Ours             | 23.797          | 0.747           | 0.198              | <b>2K</b>       |
|                     | Ours w/ TTO      | <b>29.987</b>   | <b>0.916</b>    | <b>0.136</b>       | 27K             |

Table 12. Analysis of tradeoff between rendering performance and number of Gaussians.

| # of Gaussians  | PSNR $\uparrow$ | SSIM $\uparrow$ | LPIPS $\downarrow$ | FPS $\uparrow$ |
|-----------------|-----------------|-----------------|--------------------|----------------|
| 2048 $\times$ 1 | 20.625          | 0.623           | 0.321              | <b>3083.50</b> |
| 2048 $\times$ 2 | 20.844          | 0.639           | 0.303              | 3015.03        |
| 2048 $\times$ 4 | 21.080          | 0.644           | 0.297              | 2828.14        |
| 2048 $\times$ 8 | <b>21.218</b>   | <b>0.653</b>    | <b>0.284</b>       | 2476.01        |

## 392 D. Additional ablation and discussion

### 393 D.1. Comparison of compact 3D reconstruction 394 strategies

395 To validate the effectiveness of our compact reconstruction  
396 strategy, we conduct ablation studies comparing different  
397 approaches to obtain compact representations. For the sam-  
398 pling baseline, we first estimate per-pixel Gaussian centers  
399 and their corresponding Gaussians, then downsample by  $8\times$   
400 to predict only 2,048 Gaussians, matching the number of  
401 Gaussians with our method. For the voxelization baseline,  
402 we follow AnySplat’s [19] strategy: we first estimate per-  
403 pixel Gaussians, then voxelize them with additional layers.  
404 Since AnySplat’s original voxel size cannot sufficiently re-  
405 duce the number of Gaussians, we increase the voxel size  
406 to 0.2, which results in approximately 4K Gaussians to best  
407 match the 2,048 Gaussians produced by our method.

408 As shown in Tab. 11, our strategy demonstrates superior  
409 performance compared to sampling or voxelization methods  
410 while using fewer Gaussians than voxelization. Both sam-  
411 pling and voxelization rely on per-pixel estimation, which  
412 restricts them to pixel locations and prevents accurate es-  
413 timation of necessary regions. Additionally, voxelization  
414 requires heuristic determination of voxel size and can re-  
415 duce details in high-frequency regions. In contrast, our ap-  
416 proach does not depend on pixel locations as learnable to-  
417 kens can flexibly estimate Gaussians at appropriate loca-  
418 tions, enabling more effective compact Gaussian field re-  
419 construction.

Table 13. Additional ablation studies for Comp3D- $\mathcal{F}$ .

| Detach<br>attn. | Detach<br>$\mathcal{L}_{\text{feat}}$ to $G_i$ | Lseg [25]       |                 |                 |                 |                    |
|-----------------|------------------------------------------------|-----------------|-----------------|-----------------|-----------------|--------------------|
|                 |                                                | mIOU $\uparrow$ | Acc. $\uparrow$ | PSNR $\uparrow$ | SSIM $\uparrow$ | LPIPS $\downarrow$ |
| $\times$        | $\checkmark$                                   | 0.490           | 0.761           | 23.078          | 0.750           | 0.293              |
| $\checkmark$    | $\times$                                       | 0.490           | 0.757           | 23.243          | 0.754           | 0.286              |
| $\checkmark$    | $\checkmark$                                   | <b>0.513</b>    | <b>0.783</b>    | <b>23.886</b>   | <b>0.770</b>    | <b>0.285</b>       |

## D.2. Additional analysis of number of Gaussians

420 We first analyze the tradeoff between rendering perfor-  
421 mance and the number of Gaussians in Tab. 6. Notably, this  
422 experiment reveals a slight performance drop when increas-  
423 ing the number of learnable tokens from 2,048 to 4,096.  
424 We attribute this to our framework’s design of using a fixed  
425 number of learnable queries, which encourages each query  
426 to learn cross-view correspondences. Increasing the num-  
427 ber of tokens appears to weaken this inductive bias toward  
428 coherent multi-view aggregation, making attention scores  
429 less localized and yielding no additional benefit. In con-  
430 trast, our experiments in Tab. 12 demonstrate that increas-  
431 ing the number of decoded Gaussians *per* token consistently  
432 improves performance, enabling the model to capture fine-  
433 grained details from scenes coarsely represented by 2K to-  
434 kens. We believe this analysis highlights a promising direc-  
435 tion for applications that prioritize feed-forward NVS per-  
436 formance. Note that the results in Tab. 12 are reported after  
437 75K training steps (out of 450K) to assess feasibility.  
438

## D.3. Additional ablation for feature decoder

439 We additionally ablate the components of Comp3D- $\mathcal{F}$ . In  
440 Tab. 13, we conduct experiments on (1) detaching the  
441 copied attention weights from Comp3D- $\mathcal{G}$ , and (2) propa-  
442 gating feature loss to Gaussian geometry attributes (means,  
443 covariances, spherical harmonics, and opacities). When  
444 feature loss propagates to the copied attention weights,  
445 Comp3D- $\mathcal{G}$  receives ambiguous gradients because the fea-  
446 tures are not perfectly multi-view consistent. Consequently,  
447 the attention mechanism cannot correctly identify corre-  
448 spondences between learnable query tokens and the encoder  
449 features  $\mathcal{E}(\cdot)$  (e.g., VGGT) for Comp3D- $\mathcal{G}$ . To propagate  
450 feature loss to Gaussian attributes, we modify the CUDA  
451 rasterizer from Feature-3DGS [51], which originally prop-  
452 agates feature loss only to Gaussian feature attributes. We  
453 extend the CUDA rasterizer to propagate feature loss to all  
454 Gaussian attributes. However, this also degrades geome-  
455 try estimation results because foundation model features are  
456 not perfectly multi-view consistent. We hypothesize that  
457 with perfectly multi-view invariant features, feature loss  
458 could improve reconstruction quality, especially since pho-  
459 tometric loss is also imperfect, as real-world RGB images  
460 contain visual artifacts such as appearance variations, light-  
461 ing changes, and noise.  
462

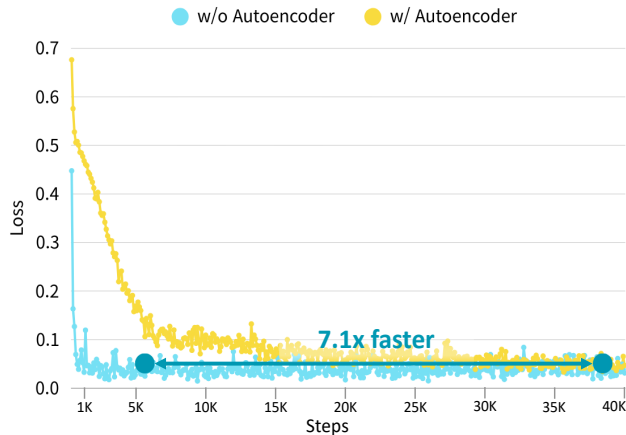

Figure 6. Convergence speed improvement by eliminating autoencoder in our framework.

Table 14. Computational Cost.

|                     | Methods              | Inference time (s) ↓ | GPU Mem. (MiB) ↓ | FPS ↑          |
|---------------------|----------------------|----------------------|------------------|----------------|
| 2-view image input  | NoPoSplat [48]       | 0.092                | 6,063            | 898.28         |
|                     | NoPo+VGGT            | 0.093                | 7,495            | 1566.28        |
|                     | Ours                 | <b>0.091</b>         | <b>4,150</b>     | <b>2742.68</b> |
| 24-view image input | AnySplat [15]        | 1.449                | 6,722            | 225.50         |
|                     | AnySplat w/ TTO [15] | 35.907               | 6,722            | 225.50         |
|                     | Ours                 | <b>0.466</b>         | <b>4,372</b>     | <b>3083.50</b> |
|                     | Ours w/ TTO          | 4.273                | <b>4,372</b>     | 2511.49        |
| Feature lifting     | LSM [9]              | 0.165                | <b>5,333</b>     | 625.12         |
|                     | Ours                 | <b>0.093</b>         | 5,896            | <b>785.35</b>  |

#### D.4. Discussion of autoencoder in existing methods

To reduce the memory consumption of Gaussians, prior works [11, 23] commonly adopt autoencoders to compress Gaussian feature dimensions and restore them via a decoder. However, autoencoder-based compression inevitably introduces information loss. Moreover, as shown in Fig. 6, removing the autoencoder allows our model to converge  $7.1\times$  faster. With an autoencoder framework, additional training time is required for the encoder–decoder architecture. In contrast, without an autoencoder, we directly leverage the attention mechanism of Comp3D- $\mathcal{G}$  to aggregate and store features. Since the attention maps in Comp3D- $\mathcal{G}$  already identify the necessary features for each learnable token, each feature token naturally attends to the same multi-view regions as its corresponding Gaussian token, effectively reusing learned correspondences for feature aggregation. This emergent property enables highly efficient feature lifting with minimal additional training overhead.

#### D.5. Discussion of Computational Costs

We include a detailed analysis of computational costs in Tab. 14. In *novel-view synthesis* settings, compared to prior works [19, 48] that employ a DPT head — which incurs significant computational overhead due to the large feature res-

olution space — our shallow transformer decoder achieves faster inference with lower peak GPU memory usage. For *feature lifting*, our model achieves higher rendering speed and FPS compared to LSM [11]. While LSM must compress features to remain tractable due to its large number of Gaussians, our compactness enables feature lifting and rendering without any compression. Although increasing the feature dimension slightly raises peak GPU memory, the overhead is modest and predictable, enabling our method to deliver higher PSNR and mIoU — validating that compact Gaussians provide an efficient and effective substrate for feature lifting.

#### D.6. Discussion of FPS

As shown in Tab. 3 and Tab. 4, our method reduces the number of Gaussians by  $65\times$  (to only **2K**) compared to per-pixel approaches [11, 48], yet FPS does not scale linearly with this reduction. We further analyze FPS in Tab 14. In the main table, FPS measurements include camera matrix multiplication and tensor operations for pre-processing prior to Gaussian rasterization. We additionally report FPS measured over the rendering step alone, which demonstrates that our compactness becomes more valuable when isolating the rendering stage, yielding substantially higher FPS.

#### D.7. Limitations

Although our view-invariant feature decoder, Comp3D- $\mathcal{F}$ , allows lifting arbitrary 2D features into 3D, we have not evaluated all recent foundation models. For instance, we believe that leveraging features from the Segment Anything Model (SAM) [22] could enable robust multi-view consistent segmentation if the features are aggregated within our framework before being decoded by a pre-trained SAM decoder; however, we did not analyze these specific features in this work.

In addition, following prior works, our experimental validation primarily focuses on multi-view open-vocabulary segmentation. To achieve holistic 3D scene understanding, future work could explore integrating our feature fields with recent Multimodal Large Language Models (MLLMs) [28, 29] to enable 3D Scene Question Answering. Furthermore, since our framework enables novel view feature rendering without information loss or compression artifacts, it holds significant promise for integration with Vision-Language-Action (VLA) models or robotics applications. However, such scenarios are frequently dynamic, whereas our current framework is limited to static scene reconstruction. Extending our compact representation to dynamic scenes remains an exciting avenue that would unlock potential across various autonomous fields.

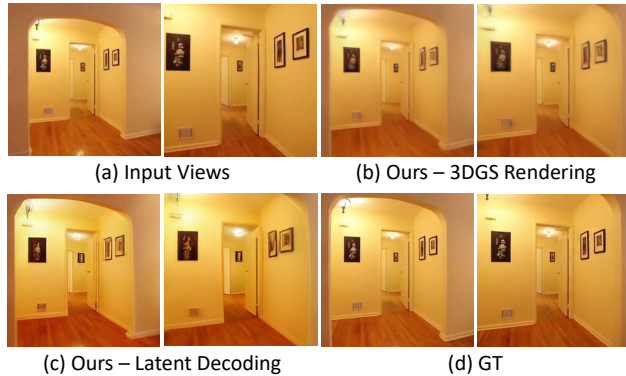

Figure 7. **Novel view synthesis via latent decoding.** We explore the potential of combining our view-invariant feature decoder,  $\text{Comp3D-}\mathcal{F}$ , with generative models. We lift DINOv2-base features (which serve as latents for a Representation Autoencoder (RAE) [49]) extracted from the input views ((a)) to 3D Gaussians and render them at novel viewpoints. (b) **Ours – 3DGS Rendering:** Standard RGB rendering from the estimated Gaussians provides faithful reconstruction but exhibits some blurriness in high-frequency regions. (c) **Ours – Latent Decoding:** By decoding the rendered feature maps through the RAE’s diffusion transformer with a 1-step denoising process, we recover significantly sharper textures and edges. Although the generative nature introduces slight variations in fine details compared to the Ground Truth (d), this validates our model’s ability to provide consistent 3D-aware latents for diffusion-based pipelines.

## 534 E. Additional experiment results

### 535 E.1. Novel view synthesis via latent decoding

536 As our multi-view invariant feature decoder  $\text{Comp3D-}\mathcal{F}$   
 537 can take any desired feature as input, we conduct an additional  
 538 experiment of leveraging the latents of the representation  
 539 autoencoder (RAE) [49] as input. Specifically,  
 540 we leverage the open-sourced RAE, which learns a diffusion  
 541 transformer [32] and a decoder based on the frozen  
 542 DINOv2-base [31] as the latent. By lifting the DINOv2-  
 543 base features and rendering novel viewpoints, we can de-  
 544 code the rendered features using the pre-trained RAE de-  
 545 coder or DiT after adding a small noise to the rendered fea-  
 546 tures. In Fig. 7, we show the results of novel view syn-  
 547 thesis obtained from the estimated 3D Gaussians (Fig. 7-(b))  
 548 and the novel view synthesis obtained by decoding the ren-  
 549 dered features through the DiT (Fig. 7-(c)). Specifically,  
 550 for this experiment, we add a 1-step noise from the original  
 551 50-step denoising schedule of RAE-DiT [49], and denoise  
 552 with 1-step. As shown in Fig. 7, renderings from 3D Gaus-  
 553 sians already provide sufficiently good results but still con-  
 554 tain some blurry regions, whereas the latent decoding yields  
 555 significantly sharper results. However, since the pipeline in-  
 556 volves a generative process, even with a single step, we ob-  
 557 serve slight deformations in fine details. Nevertheless, this  
 558 experiment demonstrates the potential of combining novel

Table 15. **Comparison of novel view synthesis on RealEstate10K [52].** Our method maintains competitive results while using far fewer Gaussians.

| Pose-free | Methods            | Average |            |        |        |        |         |
|-----------|--------------------|---------|------------|--------|--------|--------|---------|
|           |                    | #G ↓    | Memories ↓ | FPS ↑  | PSNR ↑ | SSIM ↑ | LPIPS ↓ |
| ✗         | PixelSplat [5]     | 131K    | 33.6MB     | 388.03 | 23.848 | 0.806  | 0.185   |
|           | MVSplat [6]        | 131K    | 33.6MB     | 392.6  | 23.977 | 0.811  | 0.176   |
| ✓         | CoPoNeRF [17]      | -       | -          | 0.4    | 18.938 | 0.619  | 0.388   |
|           | Splatt3R [40]      | 131K    | 33.6MB     | 393.1  | 15.318 | 0.490  | 0.436   |
|           | PF3splat [16]      | 131K    | 33.6MB     | 397.1  | 21.042 | 0.739  | 0.233   |
|           | SPFSplat [18]      | 131K    | 33.6MB     | 397.3  | 25.845 | 0.852  | 0.152   |
|           | NoPoSplat [48]     | 131K    | 33.6MB     | 369.8  | 25.033 | 0.838  | 0.160   |
|           | VGGT+NoPo [42, 48] | 100K    | 25.6MB     | 419.8  | 23.015 | 0.762  | 0.187   |
|           | AnySplat [19]      | 320K    | 81.9MB     | 319.2  | 18.828 | 0.656  | 0.358   |
|           | <b>C3G (Ours)</b>  | 2K      | 0.1MB      | 451.7  | 22.387 | 0.713  | 0.259   |

view synthesis with diffusion processes by leveraging la- 559  
 tentals as input to our  $\text{Comp3D-}\mathcal{F}$ . 560

## E.2. Novel view synthesis in two-view setting 561

In this section, we evaluate novel view synthesis perfor- 562  
 mance on the RealEstate10K dataset [52], following No- 563  
 PoSplat’s [48] protocol where two input images are used 564  
 to estimate 3D Gaussians and render a target view. We 565  
 compare with both *pose-dependent* models [5, 6] and *pose- 566*  
*free* models [16–18, 40, 48]. Since we use VGGT [42] as 567  
 our visual encoder for  $\text{Comp3D-}\mathcal{G}$ , we additionally train 568  
 VGGT+NoPo, which replaces NoPoSplat’s MAST3R [24] 569  
 backbone with VGGT [42] while maintaining NoPoS- 570  
 plat’s pipeline to estimate per-pixel Gaussians. Note that 571  
 $\text{Comp3D-}\mathcal{G}$  directly estimates Gaussians from unposed im- 572  
 ages, falling into the *pose-free* category. For NoPoSplat, 573  
 VGGT+NoPo, and ours, we follow NoPoSplat’s test-time 574  
 camera pose optimization, which is only necessary for eval- 575  
 uation. As shown in Tab. 15, despite estimating  $65\times$  fewer 576  
 Gaussians than per-pixel methods [16–18, 40, 48], our ap- 577  
 proach achieves comparable rendering quality with much 578  
 faster speeds, validating that our compact Gaussians is suf- 579  
 ficient for 3D scene reconstruction. 580

## F. Additional qualitative results 581

### F.1. Additional results of attention map visualization 582

We additionally visualize the attention maps between learn- 584  
 able tokens  $\mathbf{Q}$  and features  $\mathbf{F}$  in  $\mathcal{T}_{\mathcal{G}}$ , extending Fig. 3-(b). 585  
 As illustrated in Fig. 8,  $\text{Comp3D-}\mathcal{G}$  exhibits sharp, focused 586  
 attention patterns on spatially coherent regions across mul- 587  
 tiple views for all Gaussian tokens and input images. These 588  
 results demonstrate an emergent behavior: to accurately re- 589  
 construct novel views with a limited number of  $N$  Gaus- 590  
 sians, the model learns to position 3D Gaussians at geomet- 591  
 rically coherent regions. 592

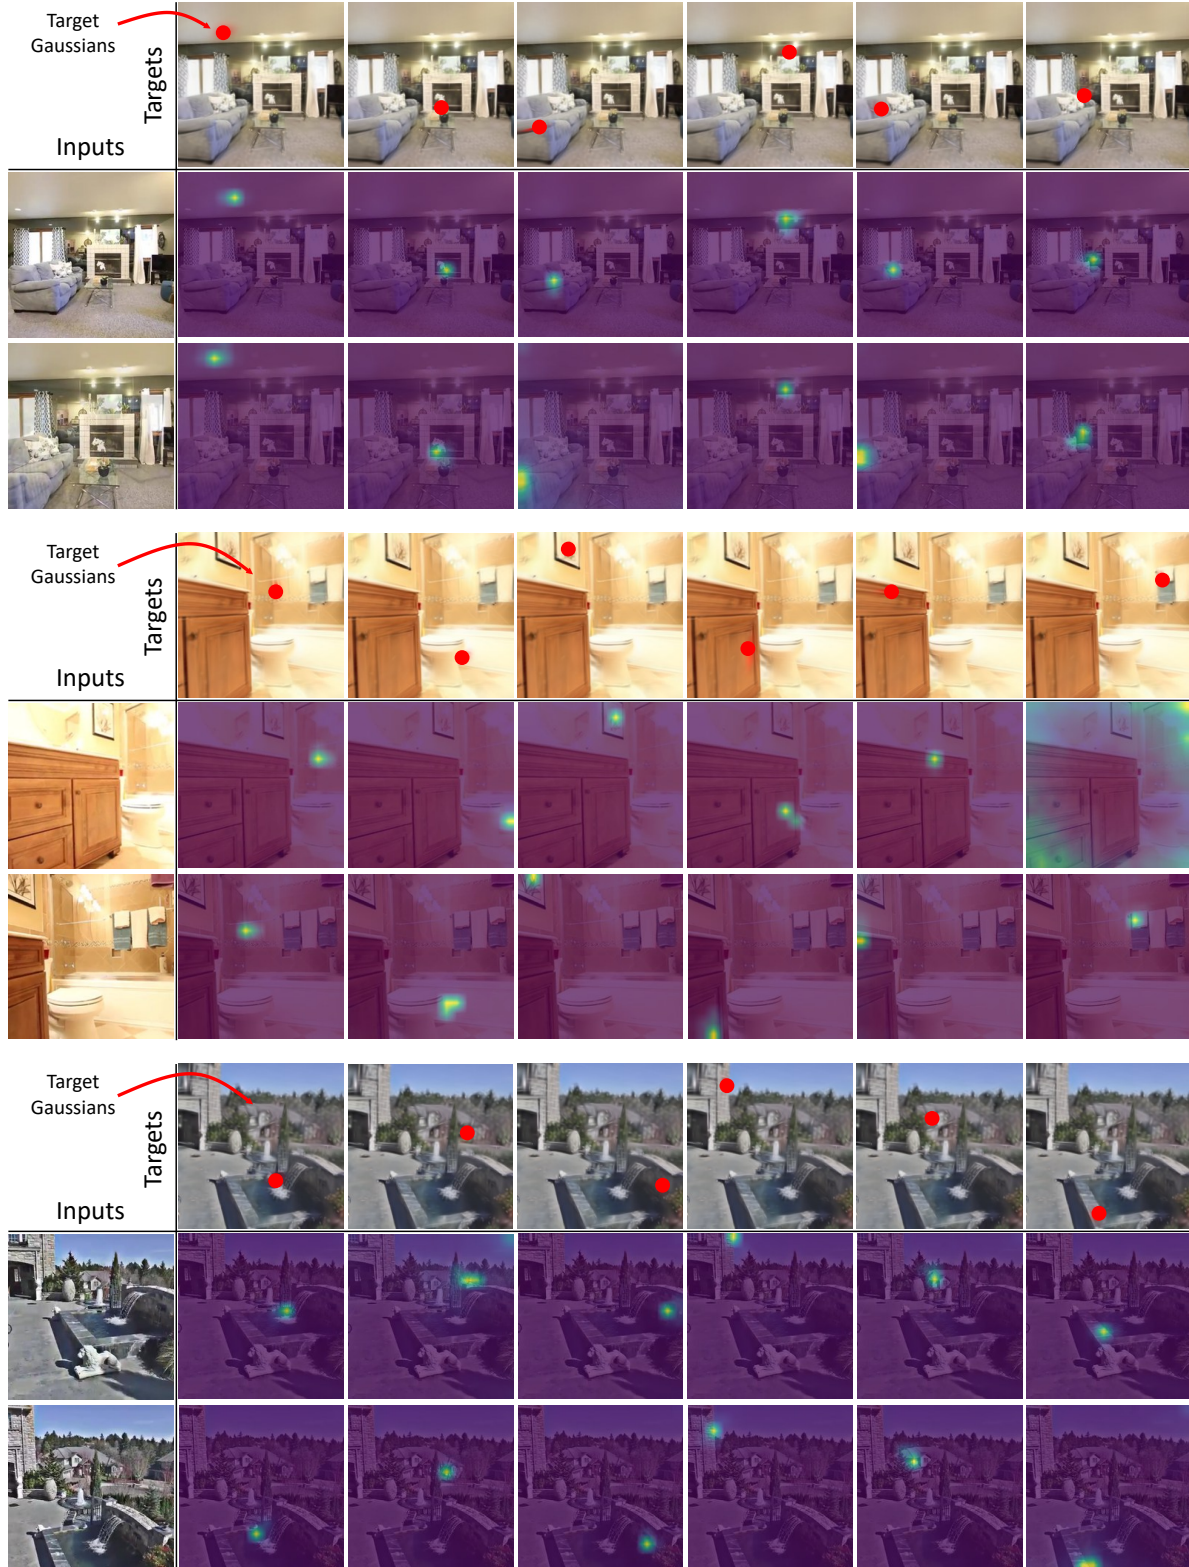

Figure 8. **Additional visualization of learned attention patterns between a target Gaussian and input images.** Without explicit supervision, each query token (red dots) learns to attend to spatially coherent regions across multiple views, naturally discovering corresponding regions.

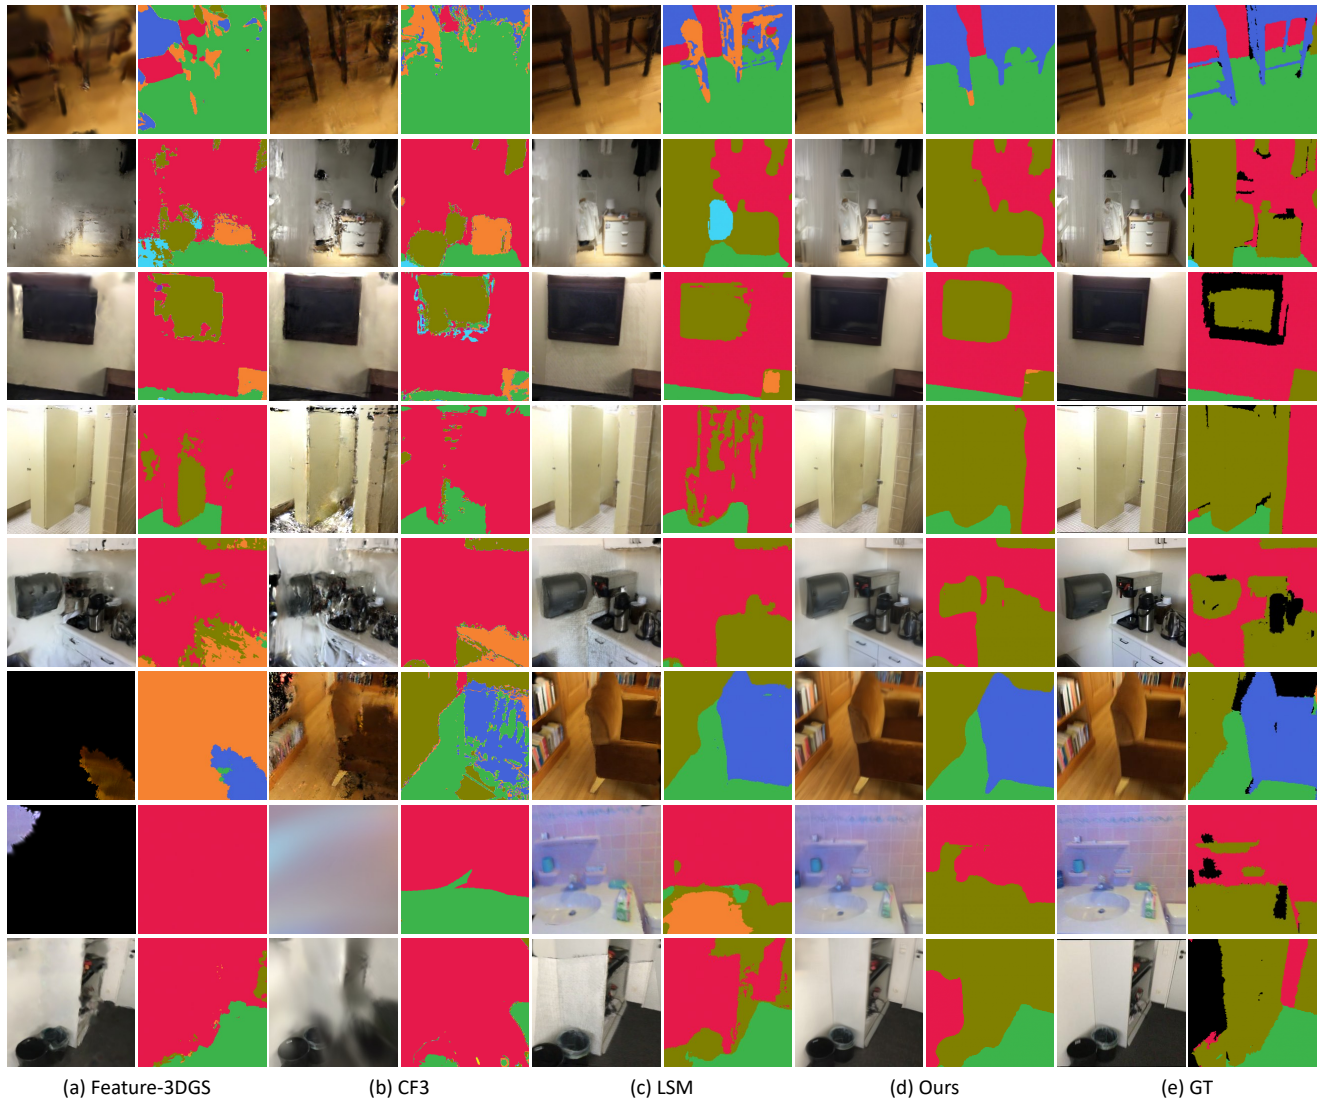

Figure 9. **Additional qualitative results of 3D scene understanding on ScanNet [9].** We conduct qualitative comparison for 3D scene understanding via novel view synthesis and open-vocabulary segmentation. When compared to both per-scene optimization ((a), (b)) and feed-forward ((c), (d)) methods, ours show the most high-fidelity renderings and accurate segmentation maps compared to the ground-truth.

593  
594

## F.2. Additional qualitative results of 3D scene understanding

595  
596  
597  
598  
599  
600  
601

We additionally present qualitative results for 3D scene understanding on the ScanNet dataset. In Fig. 9, we visualize novel view synthesis results and open-vocabulary segmentation results from feature-lifted 3D Gaussians. Our method generates more geometrically accurate 3D Gaussians and more effectively aggregates multi-view features than competing methods.

## F.3. Qualitative results of multi-view feature encoding

602  
603

In Fig. 10, we additionally visualize the comparison between pre-lifting features and features aggregated by Comp3D- $\mathcal{F}$  using PCA. As shown, our model effectively aggregates multi-view features before lifting, producing representations that are both view-invariant and more semantically discriminative.

604  
605  
606  
607  
608  
609

## F.4. Qualitative results of multi-view feature upsampling

610  
611

In Fig. 11, we present qualitative results of multi-view feature upsampling results.

612  
613

614 **F.5. Qualitative results of novel view synthesis with**  
615 **multi-view inputs**

616 In Fig. 12, we provide qualitative comparisons of novel  
617 view synthesis using 24 input images. We compare  
618 our method against AnySplat [19], a state-of-the-art feed-  
619 forward approach that supports arbitrary numbers of input  
620 views. Despite using significantly fewer Gaussians (approx.  
621 2K) compared to AnySplat (approx. 2.6M), our method  
622 produces more geometrically consistent renderings with  
623 higher quality renderings ((b) vs. (d)). Furthermore, when  
624 applying short test-time optimization (denoted as Ours w/  
625 TTO and AnySplat w/ TTO), our method significantly out-  
626 performs AnySplat in recovering high-frequency details,  
627 demonstrating that our compact representation is sufficient  
628 for reconstruction and novel view synthesis while also serv-  
629 ing as a robust initialization for per-scene optimization.

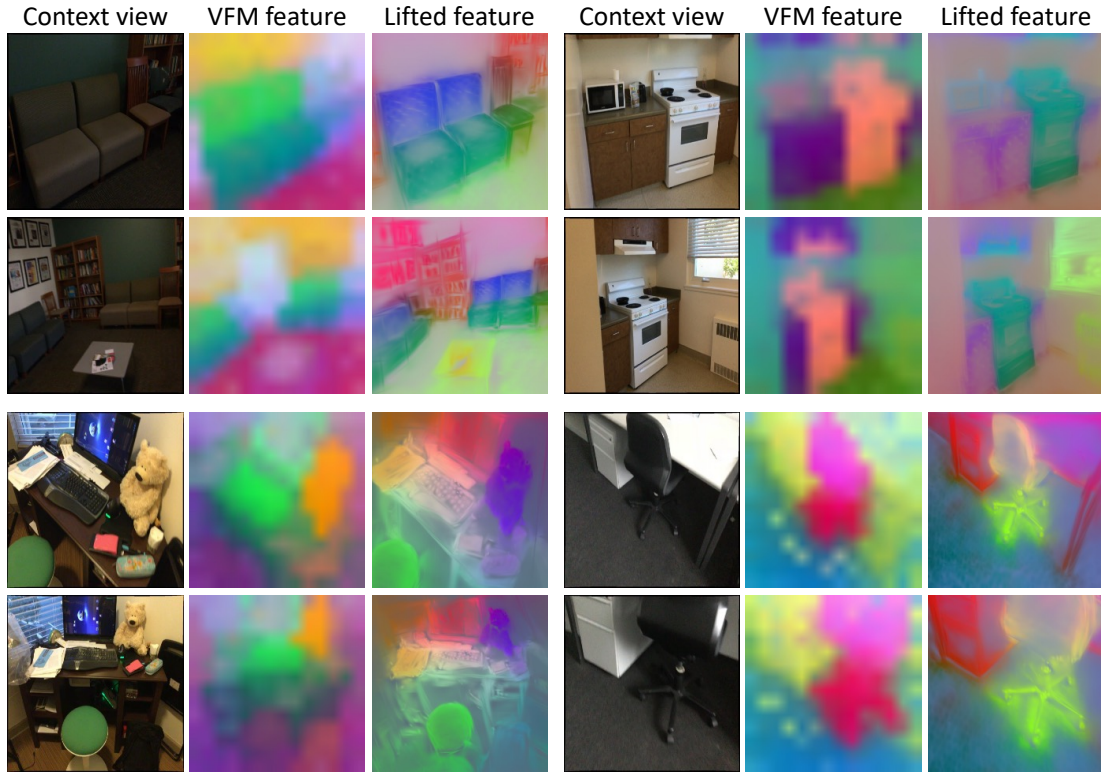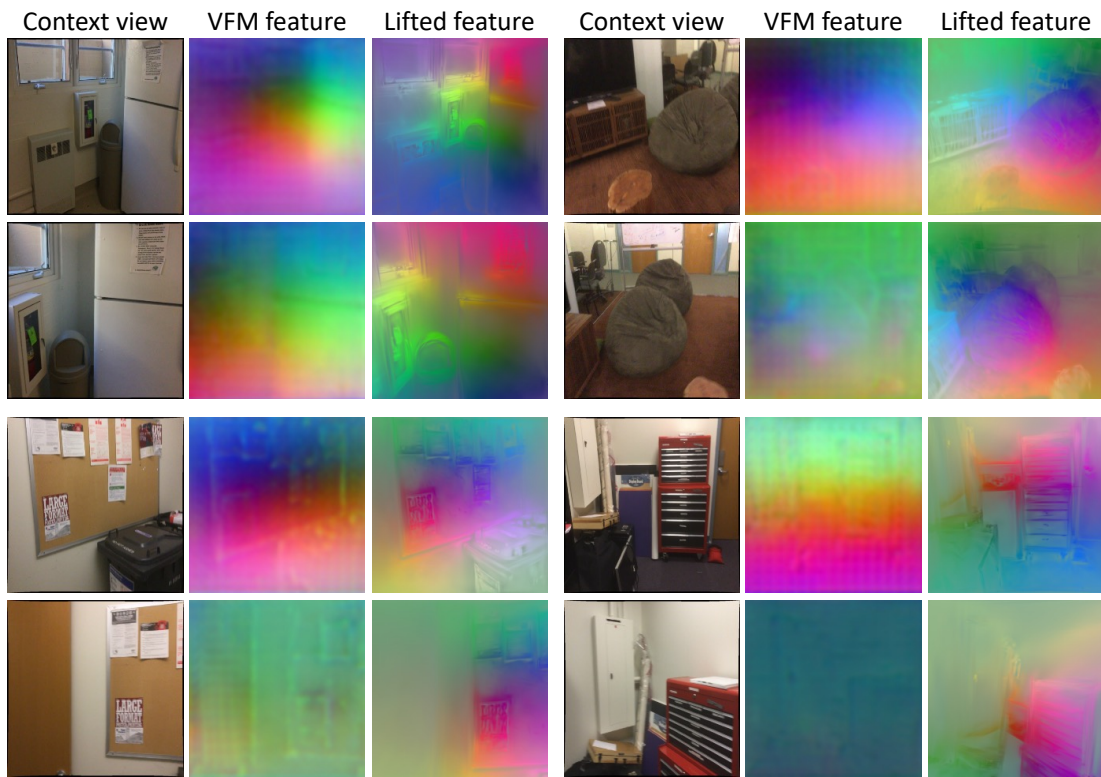

Figure 10. **Additional PCA visualization of multi-view features on ScanNet [9].** We visualize the PCA results of encoded multi-view features. Our method improves multi-view consistency compared to the original visual features.

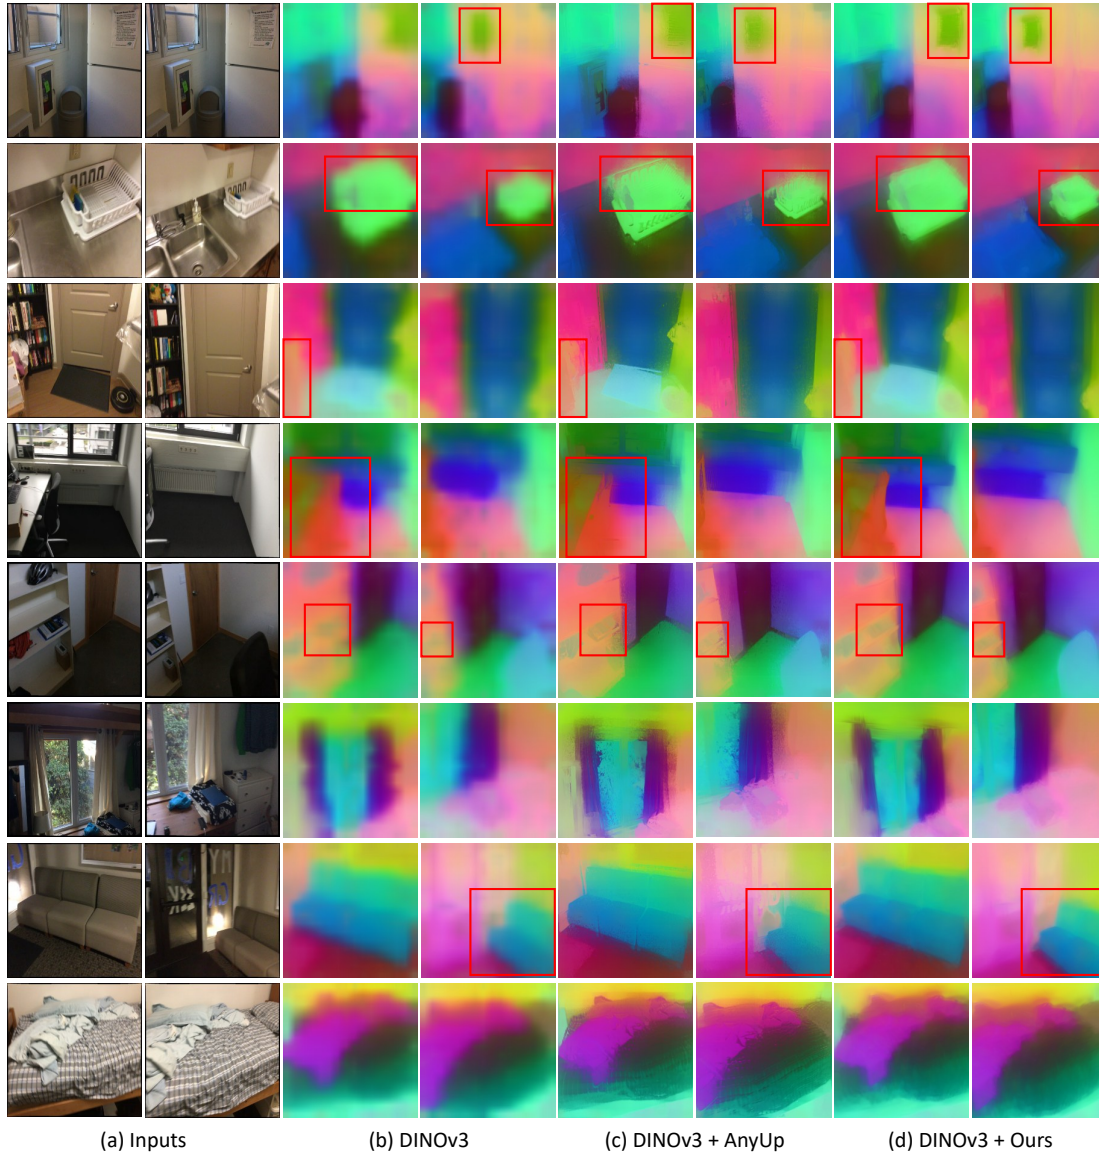

Figure 11. **Additional PCA visualization of upsampled feature on ScanNet [9].** We visualize the PCA results of the upsampled feature. Our model upsamples the features while maintaining the multi-view consistencies compared to other baselines.

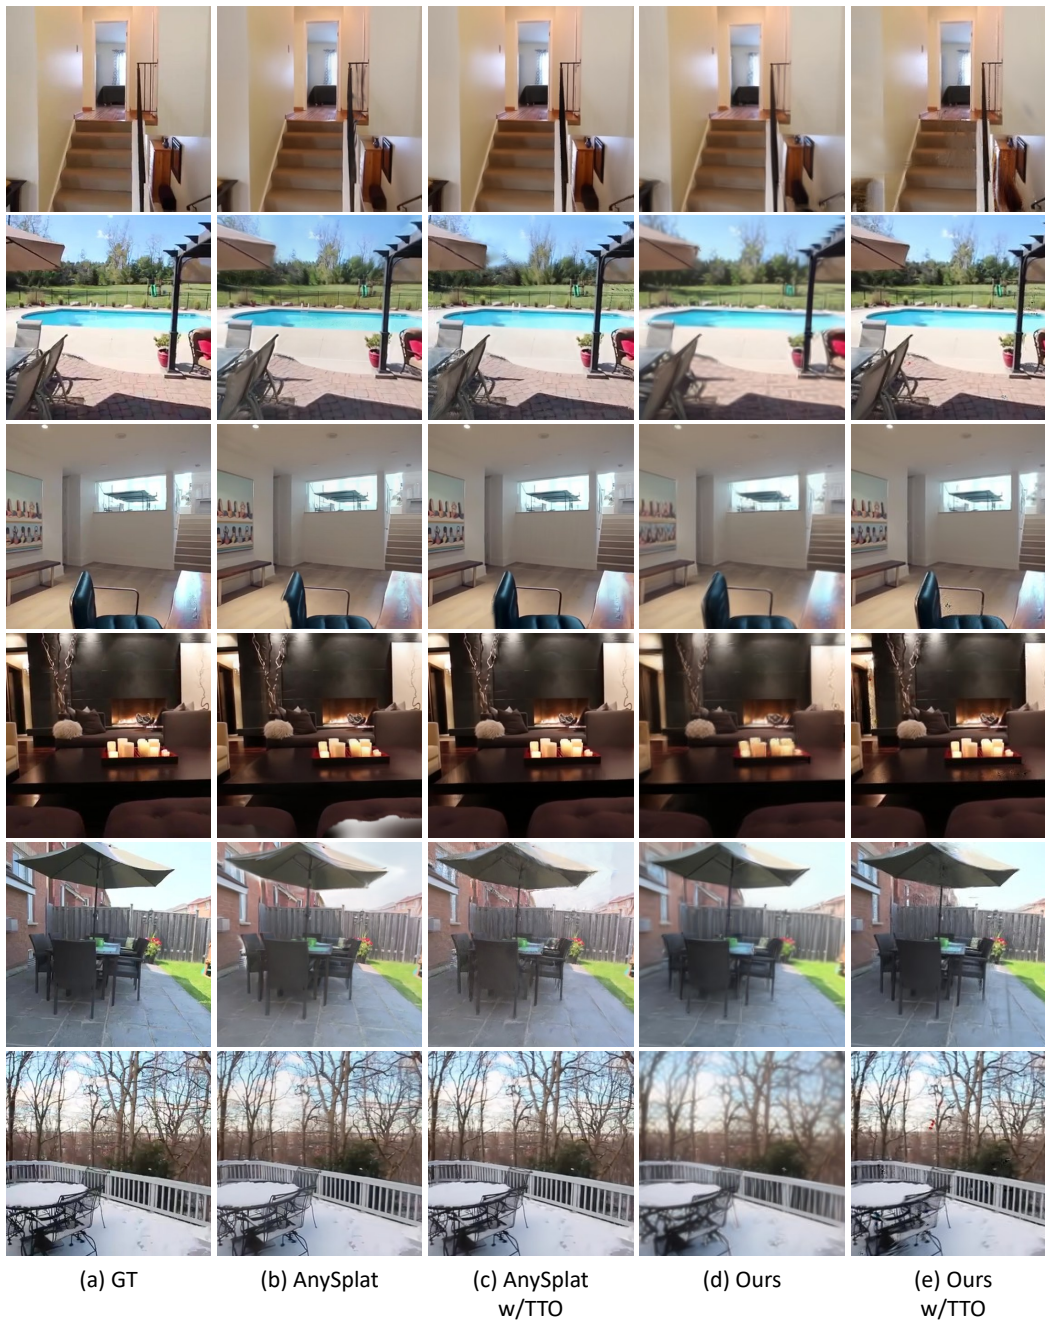

Figure 12. **Additional qualitative results of novel view synthesis on RealEstate10K [52].** We conduct a qualitative comparison for novel view synthesis with available multi-view images. Our method produces the highest quality rendering results, with or without test-time Gaussian optimization. TTO denotes that test-time optimization is applied to the Gaussians.

630  
631  
632  
633  
634  
635  
636  
637  
638  
639  
640  
641  
642  
643  
644  
645  
646  
647  
648  
649  
650  
651  
652  
653  
654  
655  
656  
657  
658  
659  
660  
661  
662  
663  
664  
665  
666  
667  
668  
669  
670  
671  
672  
673  
674  
675  
676  
677  
678  
679  
680  
681  
682  
683  
684  
685  
686

## References

- [1] Eduardo Arnold, Jamie Wynn, Sara Vicente, Guillermo Garcia-Hernando, Aron Monszpart, Victor Prisacariu, Daniyar Turmukhambetov, and Eric Brachmann. Map-free visual relocalization: Metric pose relative to a single image. In *European Conference on Computer Vision*, pages 690–708. Springer, 2022. 2
- [2] Jimmy Lei Ba, Jamie Ryan Kiros, and Geoffrey E Hinton. Layer normalization. *arXiv preprint arXiv:1607.06450*, 2016. 2
- [3] Gilad Baruch, Zhuoyuan Chen, Afshin Dehghan, Tal Dimry, Yuri Feigin, Peter Fu, Thomas Gebauer, Brandon Joffe, Daniel Kurz, Arik Schwartz, et al. Arkitscenes: A diverse real-world dataset for 3d indoor scene understanding using mobile rgb-d data. *arXiv preprint arXiv:2111.08897*, 2021. 2
- [4] Neil Burgess. Spatial memory: how egocentric and allocentric combine. *Trends in cognitive sciences*, 10(12):551–557, 2006. 3
- [5] David Charatan, Sizhe Lester Li, Andrea Tagliasacchi, and Vincent Sitzmann. pixelsplat: 3d gaussian splats from image pairs for scalable generalizable 3d reconstruction. In *Proceedings of the IEEE/CVF conference on computer vision and pattern recognition*, pages 19457–19467, 2024. 3, 8
- [6] Yuedong Chen, Haofei Xu, Chuanxia Zheng, Bohan Zhuang, Marc Pollefeys, Andreas Geiger, Tat-Jen Cham, and Jianfei Cai. Mvsplat: Efficient 3d gaussian splatting from sparse multi-view images. In *European Conference on Computer Vision*, pages 370–386. Springer, 2024. 3, 8
- [7] Seokju Cho, Sunghwan Hong, Sangryul Jeon, Yunsung Lee, Kwanghoon Sohn, and Seungryong Kim. Cats: Cost aggregation transformers for visual correspondence. *Advances in Neural Information Processing Systems*, 34:9011–9023, 2021. 4
- [8] Seokju Cho, Sunghwan Hong, and Seungryong Kim. Cats++: Boosting cost aggregation with convolutions and transformers. *IEEE Transactions on Pattern Analysis and Machine Intelligence*, 45(6):7174–7194, 2022. 4
- [9] Angela Dai, Angel X Chang, Manolis Savva, Maciej Halber, Thomas Funkhouser, and Matthias Nießner. Scannet: Richly-annotated 3d reconstructions of indoor scenes. In *Proceedings of the IEEE conference on computer vision and pattern recognition*, pages 5828–5839, 2017. 3, 4, 10, 12, 13
- [10] Mohamed El Banani, Amit Raj, Kevis-Kokitsi Maninis, Abhishek Kar, Yuanzhen Li, Michael Rubinstein, Deqing Sun, Leonidas Guibas, Justin Johnson, and Varun Jampani. Probing the 3d awareness of visual foundation models. In *Proceedings of the IEEE/CVF Conference on Computer Vision and Pattern Recognition*, pages 21795–21806, 2024. 4
- [11] Zhiwen Fan, Jian Zhang, Wenyan Cong, Peihao Wang, Renjie Li, Kairun Wen, Shijie Zhou, Achuta Kadambi, Zhangyang Wang, Danfei Xu, et al. Large spatial model: End-to-end unposed images to semantic 3d. *Advances in neural information processing systems*, 37:40212–40229, 2024. 3, 4, 7
- [12] Sunghwan Hong and Seungryong Kim. Deep matching prior: Test-time optimization for dense correspondence. In *Proceedings of the IEEE/CVF international conference on computer vision*, pages 9907–9917, 2021. 4
- [13] Sunghwan Hong, Seokju Cho, Jisu Nam, Stephen Lin, and Seungryong Kim. Cost aggregation with 4d convolutional swin transformer for few-shot segmentation. In *European Conference on Computer Vision*, pages 108–126. Springer, 2022.
- [14] Sunghwan Hong, Jisu Nam, Seokju Cho, Susung Hong, Sangryul Jeon, Dongbo Min, and Seungryong Kim. Neural matching fields: Implicit representation of matching fields for visual correspondence. *Advances in Neural Information Processing Systems*, 35:13512–13526, 2022.
- [15] Sunghwan Hong, Seokju Cho, Seungryong Kim, and Stephen Lin. Unifying feature and cost aggregation with transformers for semantic and visual correspondence. *arXiv preprint arXiv:2403.11120*, 2024. 4
- [16] Sunghwan Hong, Jaewoo Jung, Heeseong Shin, Jisang Han, Jiaolong Yang, Chong Luo, and Seungryong Kim. Pf3plat: Pose-free feed-forward 3d gaussian splatting. *arXiv preprint arXiv:2410.22128*, 2024. 3, 8
- [17] Sunghwan Hong, Jaewoo Jung, Heeseong Shin, Jiaolong Yang, Seungryong Kim, and Chong Luo. Unifying correspondence pose and nerf for generalized pose-free novel view synthesis. In *Proceedings of the IEEE/CVF Conference on Computer Vision and Pattern Recognition*, pages 20196–20206, 2024. 3, 8
- [18] Ranran Huang and Krystian Mikolajczyk. No pose at all: Self-supervised pose-free 3d gaussian splatting from sparse views. In *Proceedings of the IEEE/CVF International Conference on Computer Vision*, pages 27947–27957, 2025. 3, 8
- [19] Lihan Jiang, Yucheng Mao, Linning Xu, Tao Lu, Kerui Ren, Yichen Jin, Xudong Xu, Mulin Yu, Jiangmiao Pang, Feng Zhao, et al. Anysplat: Feed-forward 3d gaussian splatting from unconstrained views. *arXiv preprint arXiv:2505.23716*, 2025. 1, 2, 3, 6, 7, 8, 11
- [20] Bernhard Kerbl, Georgios Kopanas, Thomas Leimkühler, and George Drettakis. 3d gaussian splatting for real-time radiance field rendering. *ACM Trans. Graph.*, 42(4):139–1, 2023. 1, 3
- [21] Diederik P Kingma and Jimmy Ba. Adam: A method for stochastic optimization. *arXiv preprint arXiv:1412.6980*, 2014. 1, 3
- [22] Alexander Kirillov, Eric Mintun, Nikhila Ravi, Hanzi Mao, Chloe Rolland, Laura Gustafson, Tete Xiao, Spencer Whitehead, Alexander C Berg, Wan-Yen Lo, et al. Segment anything. In *Proceedings of the IEEE/CVF international conference on computer vision*, pages 4015–4026, 2023. 7
- [23] Hyunjoon Lee, Joonkyu Min, and Jaesik Park. Cf3: Compact and fast 3d feature fields. *arXiv preprint arXiv:2508.05254*, 2025. 4, 7
- [24] Vincent Leroy, Yohann Cabon, and Jérôme Revaud. Grounding image matching in 3d with mast3r. In *European Conference on Computer Vision*, pages 71–91. Springer, 2024. 3, 8
- [25] Boyi Li, Kilian Q Weinberger, Serge Belongie, Vladlen Koltun, and René Ranftl. Language-driven semantic segmentation. *arXiv preprint arXiv:2201.03546*, 2022. 4, 6

687  
688  
689  
690  
691  
692  
693  
694  
695  
696  
697  
698  
699  
700  
701  
702  
703  
704  
705  
706  
707  
708  
709  
710  
711  
712  
713  
714  
715  
716  
717  
718  
719  
720  
721  
722  
723  
724  
725  
726  
727  
728  
729  
730  
731  
732  
733  
734  
735  
736  
737  
738  
739  
740  
741  
742  
743  
744

- 745 [26] Wanhua Li, Yujie Zhao, Minghan Qin, Yang Liu, Yuanhao  
746 Cai, Chuang Gan, and Hanspeter Pfister. Langsplatv2: High-  
747 dimensional 3d language gaussian splatting with 450+ fps.  
748 *arXiv preprint arXiv:2507.07136*, 2025. 4
- 749 [27] Lu Ling, Yichen Sheng, Zhi Tu, Wentian Zhao, Cheng Xin,  
750 Kun Wan, Lantao Yu, Qianyu Guo, Zixun Yu, Yawen Lu,  
751 et al. DI3dv-10k: A large-scale scene dataset for deep  
752 learning-based 3d vision. In *Proceedings of the IEEE/CVF*  
753 *Conference on Computer Vision and Pattern Recognition*,  
754 pages 22160–22169, 2024. 2
- 755 [28] Haotian Liu, Chunyuan Li, Qingyang Wu, and Yong Jae Lee.  
756 Visual instruction tuning. *Advances in neural information*  
757 *processing systems*, 36:34892–34916, 2023. 7
- 758 [29] Haotian Liu, Chunyuan Li, Yuheng Li, and Yong Jae Lee.  
759 Improved baselines with visual instruction tuning. In *Pro-*  
760 *ceedings of the IEEE/CVF conference on computer vision*  
761 *and pattern recognition*, pages 26296–26306, 2024. 7
- 762 [30] David G Lowe. Distinctive image features from scale-  
763 invariant keypoints. *International journal of computer vi-*  
764 *sion*, 60(2):91–110, 2004. 4
- 765 [31] Maxime Oquab, Timothée Darcet, Théo Moutakanni, Huy  
766 Vo, Marc Szafraniec, Vasil Khalidov, Pierre Fernandez,  
767 Daniel Haziza, Francisco Massa, Alaaeldin El-Nouby, et al.  
768 Dinov2: Learning robust visual features without supervision.  
769 *arXiv preprint arXiv:2304.07193*, 2023. 4, 5, 8
- 770 [32] William Peebles and Saining Xie. Scalable diffusion models  
771 with transformers. In *Proceedings of the IEEE/CVF inter-*  
772 *national conference on computer vision*, pages 4195–4205,  
773 2023. 8
- 774 [33] Luigi Piccinelli, Yung-Hsu Yang, Christos Sakaridis, Mattia  
775 Segu, Siyuan Li, Luc Van Gool, and Fisher Yu. Unidepth:  
776 Universal monocular metric depth estimation. In *Proceed-*  
777 *ings of the IEEE/CVF Conference on Computer Vision and*  
778 *Pattern Recognition*, pages 10106–10116, 2024. 4
- 779 [34] Minghan Qin, Wanhua Li, Jiawei Zhou, Haoqian Wang, and  
780 Hanspeter Pfister. Langsplat: 3d language gaussian splatting.  
781 In *Proceedings of the IEEE/CVF Conference on Computer*  
782 *Vision and Pattern Recognition*, pages 20051–20060, 2024.  
783 4
- 784 [35] Alec Radford, Jong Wook Kim, Chris Hallacy, Aditya  
785 Ramesh, Gabriel Goh, Sandhini Agarwal, Girish Sastry,  
786 Amanda Askell, Pamela Mishkin, Jack Clark, et al. Learning  
787 transferable visual models from natural language supervi-  
788 sion. In *International conference on machine learning*, pages  
789 8748–8763. PmLR, 2021. 4
- 790 [36] Mike Roberts, Jason Ramapuram, Anurag Ranjan, Atulit  
791 Kumar, Miguel Angel Bautista, Nathan Paczan, Russ Webb,  
792 and Joshua M Susskind. Hypersim: A photorealistic syn-  
793 thetic dataset for holistic indoor scene understanding. In  
794 *Proceedings of the IEEE/CVF international conference on*  
795 *computer vision*, pages 10912–10922, 2021. 2
- 796 [37] Paul-Edouard Sarlin, Daniel DeTone, Tomasz Malisiewicz,  
797 and Andrew Rabinovich. Superglue: Learning feature  
798 matching with graph neural networks. In *Proceedings of*  
799 *the IEEE/CVF conference on computer vision and pattern*  
800 *recognition*, pages 4938–4947, 2020. 4
- 801 [38] Johannes L Schonberger and Jan-Michael Frahm. Structure-  
802 from-motion revisited. In *Proceedings of the IEEE con-*  
*ference on computer vision and pattern recognition*, pages  
4104–4113, 2016. 3, 4
- [39] Oriane Siméoni, Huy V Vo, Maximilian Seitzer, Federico  
Baldassarre, Maxime Oquab, Cijo Jose, Vasil Khalidov,  
Marc Szafraniec, Seungeun Yi, Michaël Ramamonjisoa,  
et al. Dinov3. *arXiv preprint arXiv:2508.10104*, 2025. 2,  
4, 5
- [40] Brandon Smart, Chuanxia Zheng, Iro Laina, and Vic-  
tor Adrian Prisacariu. Splatt3r: Zero-shot gaussian  
splatting from uncalibrated image pairs. *arXiv preprint*  
*arXiv:2408.13912*, 2024. 3, 8
- [41] Julian Straub, Thomas Whelan, Lingni Ma, Yufan Chen, Erik  
Wijmans, Simon Green, Jakob J Engel, Raul Mur-Artal, Carl  
Ren, Shobhit Verma, et al. The replica dataset: A digital  
replica of indoor spaces. *arXiv preprint arXiv:1906.05797*,  
2019. 3
- [42] Jianyuan Wang, Minghao Chen, Nikita Karaev, Andrea  
Vedaldi, Christian Rupprecht, and David Novotny. Vggt: Vi-  
sual geometry grounded transformer. In *Proceedings of the*  
*Computer Vision and Pattern Recognition Conference*, pages  
5294–5306, 2025. 1, 2, 3, 4, 8
- [43] Ruicheng Wang, Sicheng Xu, Cassie Dai, Jianfeng Xiang,  
Yu Deng, Xin Tong, and Jiaolong Yang. Moge: Unlocking  
accurate monocular geometry estimation for open-domain  
images with optimal training supervision. In *Proceedings of*  
*the IEEE/CVF Conference on Computer Vision and Pattern*  
*Recognition*, pages 5261–5271, 2025. 1
- [44] Wenshan Wang, Delong Zhu, Xiangwei Wang, Yaoyu Hu,  
Yuheng Qiu, Chen Wang, Yafei Hu, Ashish Kapoor, and Se-  
bastian Scherer. Tartanair: A dataset to push the limits of  
visual slam. In *2020 IEEE/RSJ International Conference*  
*on Intelligent Robots and Systems (IROS)*, pages 4909–4916.  
IEEE, 2020. 2
- [45] Thomas Wimmer, Prune Truong, Marie-Julie Rakotosaona,  
Michael Oechsle, Federico Tombari, Bernt Schiele, and  
Jan Eric Lenssen. Anyup: Universal feature upsampling.  
*arXiv preprint arXiv:2510.12764*, 2025. 5
- [46] Hongchi Xia, Yang Fu, Sifei Liu, and Xiaolong Wang. Rgb-  
d objects in the wild: Scaling real-world 3d object learning  
from rgb-d videos. In *Proceedings of the IEEE/CVF Con-*  
*ference on Computer Vision and Pattern Recognition*, pages  
22378–22389, 2024. 2
- [47] Yao Yao, Zixin Luo, Shiwei Li, Jingyang Zhang, Yufan Ren,  
Lei Zhou, Tian Fang, and Long Quan. Blendedmvs: A large-  
scale dataset for generalized multi-view stereo networks. In  
*Proceedings of the IEEE/CVF conference on computer vi-*  
*sion and pattern recognition*, pages 1790–1799, 2020. 2
- [48] Botao Ye, Sifei Liu, Haofei Xu, Xueting Li, Marc Pollefeys,  
Ming-Hsuan Yang, and Songyou Peng. No pose, no problem:  
Surprisingly simple 3d gaussian splats from sparse unposed  
images. *arXiv preprint arXiv:2410.24207*, 2024. 1, 2, 3, 7, 8
- [49] Boyang Zheng, Nanye Ma, Shengbang Tong, and Saining  
Xie. Diffusion transformers with representation autoen-  
coders. *arXiv preprint arXiv:2510.11690*, 2025. 8
- [50] Chong Zhou, Chen Change Loy, and Bo Dai. Extract free  
dense labels from clip. In *European conference on computer*  
*vision*, pages 696–712. Springer, 2022. 4

- 860 [51] Shijie Zhou, Haoran Chang, Sicheng Jiang, Zhiwen Fan, Ze-  
861 hao Zhu, Dejie Xu, Pradyumna Chari, Suyu You, Zhangyang  
862 Wang, and Achuta Kadambi. Feature 3dgs: Supercharging  
863 3d gaussian splatting to enable distilled feature fields. In *Pro-  
864 ceedings of the IEEE/CVF Conference on Computer Vision  
865 and Pattern Recognition*, pages 21676–21685, 2024. 3, 4, 6
- 866 [52] Tinghui Zhou, Richard Tucker, John Flynn, Graham Fyffe,  
867 and Noah Snavely. Stereo magnification: Learning  
868 view synthesis using multiplane images. *arXiv preprint  
869 arXiv:1805.09817*, 2018. 1, 3, 8, 14
